# Supplementary material for: Salinization origin of Souf Terminal Complex: Application of statistical modelling and WQI for groundwater management
Source: Copernicus journal article supplement (doi:10.5194/hess-2020-408), 2020-09-17
Supplement: Supplementary file 2 [file EXCEL all manipulations WQI-FA-PCA-CHA- Binary diagrams preprint.xlsx]

## Sheet: ACP_HID
	-0.191867	0.367435	-0.324413	1.16137	-1.03128	0.77573	0.385521	0.273239	-0.899124	0.321768	-0.0127307	0.291321	2.18	0.164114	0.0140778	0.45345	0.253127	-0.155941	-0.365344	-0.0270371
	-0.89857	-1.19864	-2.30629	0.208344	0.25525	0.518963	0.213797	-0.0401133	0.519396	0.191426	0.944761	-0.386782	0.332047	-0.265269	-0.036312	-0.193661	0.207269	0.242539	1.42139	-1.38167
	-0.512715	0.618365	-1.01133	-1.10312	1.04467	-0.594558	0.979462	0.587729	0.288797	-0.134116	0.767864	-0.225404	0.149296	0.664717	1.57373	-0.91649	-0.544306	-0.711496	-0.181434	0.19031
	-2.06378	-0.748566	3.41899	-0.43017	0.270849	0.513873	0.539758	-0.0557782	-0.295561	0.0203691	0.793565	-0.487539	-0.349104	0.50107	-0.394132	1.53435	-0.578472	-0.998038	-0.336781	-0.314134
	2.21521	2.03951	0.177492	-0.978621	0.766961	0.929751	0.177871	-0.370936	-0.240159	0.1501	0.857739	0.105684	-0.179882	-0.884871	-0.409713	-0.64921	1.02223	-0.627392	-1.22968	-0.436476
	2.59906	0.379913	1.57466	0.0565452	0.200102	-0.169957	-0.636761	0.580549	1.17277	0.0650899	0.556092	0.697475	-0.237398	1.72931	-0.56073	-0.220868	0.979957	0.251511	0.158422	0.195758
	-0.727291	-0.922524	-0.595377	0.30755	0.0554755	0.425369	0.166073	-0.155918	0.13084	-0.0561441	0.938631	0.162122	0.228466	-0.643186	-0.627328	-0.159919	-0.206312	-0.407453	0.861026	1.59703
	-2.96723	-1.72154	0.294442	-0.64233	0.084544	0.492339	0.0287818	-0.434902	0.178292	0.0838999	0.680105	-1.21415	0.00689894	-0.066406	0.548267	0.56438	0.643065	1.3254	-0.424804	0.617932
	0.683864	-1.38855	-1.3797	-0.430685	-0.541605	-0.346866	-0.0494866	-0.277358	-0.306755	-0.289658	0.326184	1.47206	-0.372572	-0.55663	1.14028	0.99066	0.46812	0.113226	0.239103	-0.00446064
	1.32578	1.53935	-0.724825	-1.13148	1.07083	0.579098	-0.00300887	-0.326905	-0.213846	-0.140953	-0.828106	-0.777679	-0.0786631	0.033286	0.427363	0.244325	1.36907	-1.14671	0.690214	0.294827
	-0.986943	-0.515188	-0.403382	-1.22558	-0.0671688	0.990734	-1.26008	0.77246	-0.442672	-0.00243225
	-2.74979	-0.767158	0.457716	-1.11273	-0.205579	-0.259558	-0.260758	-0.358411	0.180113	0.0896222
	-0.439104	1.6419	-0.334292	1.02626	0.227073	-0.677347	-1.14696	0.183734	-0.721138	-0.117505
	-1.76745	1.38247	0.211077	1.09951	-0.630491	-0.83565	0.494402	0.439781	0.160142	0.0905486
	-1.75159	-0.560396	0.87976	-0.621949	-0.939508	-0.71725	-0.346343	0.27277	-0.214763	-0.134903
	-0.192533	0.251467	-0.0953006	0.610318	-0.997076	-0.49608	-0.0746457	-0.661173	0.363796	-0.362093
	-1.64892	1.10495	0.149783	1.48291	-0.346752	1.14679	-0.0832646	-1.00304	0.420646	-0.0609805
	-2.01304	0.13543	-0.470081	0.425915	0.712834	-0.872055	-0.362207	-0.604243	0.0428899	0.18075
	-2.51601	0.152886	-0.065438	-0.754655	0.360436	-0.409594	0.357082	0.3767	-0.0662881	-0.183047
	-1.68778	2.55623	-0.0944337	0.367888	-0.0793595	-0.253299	0.278707	0.449147	0.203263	0.116815
	0.951855	-1.75381	-0.665681	0.640942	-0.612536	0.259078	0.481001	0.810118	0.0472592	0.107284
	2.20082	-2.11062	0.573708	1.78472	2.01861	-0.868227	-0.119254	-0.151381	-0.403736	0.0995096
	3.75532	-0.405925	0.297815	0.947778	0.0116952	1.03717	-0.283136	0.494366	0.4673	-0.254333
	4.77084	-0.0586795	0.592873	-0.261462	-0.592967	-0.213906	0.829433	-0.298895	-0.563621	-0.195737
	4.61185	-0.018318	-0.157765	-1.42726	-1.03501	-0.954549	-0.305981	-0.501537	0.19216	0.414719

## Sheet: ACP_HID1
	-0.221754	0.226617	-0.0666284	0.187947
	0.120735	-1.06746	0.714556	0.379346
	-0.448235	0.340514	0.56304	0.368343
	-0.518621	-0.990131	0.632605	0.208881
	0.065872	1.96405	0.557724	0.652667
	0.87662	0.836558	0.236282	0.847543
	0.0788037	-0.829252	0.601065	0.745577
	-0.489426	-1.89409	0.700803	-0.358314
	0.821724	-0.865262	-0.0731688	1.21438
	-0.0871369	1.40787	-0.403852	-1.08603
	-0.185591	-0.588134
	-0.782438	-1.15138
	-0.825564	1.10269
	-1.24768	0.627555
	-0.469924	-0.785714
	-0.175968	0.141913
	-1.09063	0.450711
	-0.849589	-0.334626
	-1.05536	-0.430178
	-1.68227	1.50057
	1.07271	-1.07391
	1.70814	-1.0652
	1.64577	0.512475
	1.90934	0.984301
	1.83046	0.979503

## Sheet: PCA_HID
	-0.212197	0.375933	-0.325289	1.11695	-1.00018	0.833783	0.450698	0.276506	-0.896317	0.331792	0.00188745	-0.0187088	0.277574	2.17531	0.144625	0.025427	0.463597	0.249502	-0.163344	-0.361258	-0.0311903	-0.000414117
	-0.796781	-1.26042	-2.30867	0.216501	0.264475	0.520533	0.197074	-0.0576826	0.521908	0.198643	-0.000104155	0.876117	-0.275819	0.328368	-0.185724	-0.0587192	-0.236901	0.105458	0.18417	1.45124	-1.43861	0.00165619
	-0.509544	0.521649	-1.00581	-1.15959	1.04106	-0.588616	1.00795	0.535139	0.316981	-0.148209	-0.00059639	0.700184	-0.1073	0.144903	0.716059	1.54773	-0.962862	-0.589891	-0.684997	-0.196919	0.153225	-0.169521
	-2.04361	-0.907574	3.42027	-0.445919	0.281703	0.523369	0.537219	-0.0793172	-0.285173	0.0148853	-0.000493829	0.736294	-0.371601	-0.352511	0.558553	-0.386984	1.49301	-0.703965	-0.985493	-0.341083	-0.385057	-0.198991
	2.29309	2.05509	0.185169	-1.06527	0.782342	0.925939	0.152438	-0.377677	-0.241692	0.153318	-0.000351483	0.789895	0.170544	-0.178947	-0.83657	-0.431231	-0.663662	0.946116	-0.682472	-1.19195	-0.578458	-0.372454
	2.72433	0.502775	1.57357	0.0899388	0.188848	-0.196147	-0.641928	0.592698	1.17003	0.0738088	0.000799762	0.47363	0.792517	-0.239356	1.69585	-0.539408	-0.161962	1.02568	0.210162	0.173361	0.188544	-0.0408373
	-0.684779	-0.954145	-0.597869	0.324518	0.0619471	0.425549	0.143695	-0.168784	0.134164	-0.0599996	0.000228729	0.857402	0.246947	0.227662	-0.58894	-0.646018	-0.191364	-0.284327	-0.419526	0.858249	1.45109	-0.720005
	-2.95353	-1.90257	0.293661	-0.621851	0.0851339	0.479842	-0.0119227	-0.441441	0.174249	0.0872999	7.37495e-05	0.665816	-1.12213	0.00206184	0.0207938	0.537721	0.521792	0.59265	1.25567	-0.356452	0.354108	-0.906401
	0.870411	-1.37601	-1.38301	-0.359222	-0.559468	-0.365071	-0.0802478	-0.277926	-0.304795	-0.304941	-0.000118689	0.264485	1.43932	-0.365699	-0.638793	1.15685	0.986193	0.443875	0.0804786	0.253946	-0.0265553	-0.057586
	1.33526	1.53945	-0.718222	-1.19368	1.07481	0.556217	-0.0412177	-0.330211	-0.213341	-0.148815	0.00156863	-0.729608	-0.858257	-0.0790132	0.0217284	0.43725	0.260902	1.29421	-1.2189	0.697638	0.281077	-0.0704144
	-0.958637	-0.614654	-0.401055	-1.21968	-0.0688932	0.95486	-1.24689	0.831802	-0.450559	-0.00162728	-0.000990129	0.91486	-0.421881	0.00909374	-0.233586	0.063602	0.151089	0.313233	0.102119	-0.0945358	0.58568	1.92596
	-2.85372	-0.921112	0.459675	-1.10198	-0.219003	-0.275867	-0.283293	-0.347494	0.16924	0.0972949	1.40356e-05
	-0.841915	1.76946	-0.334238	1.00821	0.220162	-0.686686	-1.10252	0.254605	-0.743647	-0.112189	-0.000717531
	-2.13958	1.40312	0.212239	1.045	-0.622111	-0.783989	0.567497	0.426466	0.165995	0.0976801	0.000267562
	-1.86355	-0.628231	0.879869	-0.588576	-0.957919	-0.720829	-0.323231	0.292777	-0.217009	-0.138425	0.000611706
	-0.394189	0.345328	-0.0977523	0.6455	-1.00733	-0.49401	-0.11903	-0.66469	0.35643	-0.371182	0.000368524
	-2.03461	1.15643	0.149097	1.43802	-0.318779	1.1666	-0.144471	-1.00365	0.404217	-0.0551497	-0.000988062
	-2.26944	0.117324	-0.4706	0.421733	0.702113	-0.883322	-0.366611	-0.578972	0.0209571	0.197484	0.000120161
	-2.69985	0.0236064	-0.0617745	-0.789451	0.356477	-0.405899	0.381342	0.359706	-0.0530799	-0.193366	0.00109353
	-2.13502	2.54982	-0.088152	0.258755	-0.0641486	-0.213082	0.33943	0.443438	0.206437	0.125526	-0.00109953
	1.27604	-1.75077	-0.671281	0.688954	-0.604212	0.282434	0.522595	0.785648	0.0675707	0.103298	-0.0010394
	2.5465	-1.97974	0.562869	1.88208	2.00654	-0.899496	-0.115193	-0.139039	-0.408866	0.101939	1.28454e-05
	4.05228	-0.227803	0.292545	0.998373	0.0219763	1.02265	-0.310261	0.489869	0.478117	-0.267804	0.000545174
	5.22627	0.0771845	0.591521	-0.222109	-0.598884	-0.204224	0.812352	-0.336607	-0.546844	-0.2156	-0.000957856
	5.06675	0.0858791	-0.156763	-1.3672	-1.06667	-0.974544	-0.325475	-0.485162	0.175027	0.434338	-0.000134814

## Sheet: PCA_HID1
	-0.204643	0.243305	-0.0559562	0.17884
	0.11648	-1.06989	0.642807	0.337173
	-0.365204	0.30137	0.49614	0.346934
	-0.471288	-1.01805	0.561949	0.187632
	0.185489	1.91191	0.514384	0.591057
	0.862444	0.832266	0.201139	0.827069
	0.0573521	-0.823661	0.548735	0.683909
	-0.485437	-1.90998	0.630348	-0.368622
	0.784441	-0.87477	-0.0426126	1.1444
	-0.00550845	1.36775	-0.366206	-1.02578
	-0.158511	-0.617796	0.69204	0.260417
	-0.772772	-1.16461
	-0.903975	1.17163
	-1.27277	0.681036
	-0.495789	-0.780352
	-0.263244	0.189921
	-1.15143	0.5156
	-0.895996	-0.295308
	-1.02752	-0.4374
	-1.6508	1.53302
	1.06175	-1.08461
	1.61742	-1.0405
	1.60594	0.513706
	1.94834	0.937921
	1.88521	0.917495

## Sheet: Origin Data
groundwater	Noun	X	Y	Sample	pH	EC	Ca	Mg	Na	K	Cl	SO4	NO3	HCO3
M-P	Zgoum 2 Bis	6° 54' 01"	33° 28' 31"	OS02-18	8.08	4080	235	204.8	460	34	712.5	1187.5	12.5	195.2
M-P	Chott 1er Nov	6° 55' 56"	33° 32' 09"	OS03-18	8.09	4180	232.5	163.8	430	19	700	1087.5	7.4	207.4
M-P	Drimini Debila	6° 56' 15"	33° 30' 22"	OS04-18	7.63	4340	245	199.7	430	27	700	1225	13	207.4
M-P	Teksebt El Gharbia	6° 53' 29"	33° 19' 06"	OS06-18	8.02	4090	265	179.2	440	31	687.5	1037.5	16	186.05
Pont	Debila centre Debila	6° 43' 12"	33° 39' 25"	OS08-18	7.86	4510	250	153.6	480	26	712.5	1187.5	22.5	201.3
M-P	Bayada 1 Bis Centre	6° 56' 52"	33° 33' 50"	OS10-18	8.68	4330	240	166.4	430	21.5	687.5	1187.5	8.5	207.4
Pont	Fouilia 03	6° 47' 45"	33° 29' 33"	OS13-18	8.17	4600	262.5	204.5	510	28.5	837.5	1162.5	31.5	189.1
M-P	APC F6	6° 45' 46"	33° 32' 30"	OS14-18	7.91	4690	247.3	204.8	462.5	31	750	1350	6.5	198.25
M-P	Oum Zbed	6° 42' 37"	33° 11' 57"	OS15-18	8.28	5180	272.5	192	450	30	878.5	1225	16.5	186.05
M-P	Mouih Ouenza F02	6° 46' 27"	33° 24' 17"	OS17-18	8.11	4780	317.5	204.8	462.5	31	725	1375	7	198.25
M-P	Oued Alanda F01	6° 51' 25"	33° 20' 42"	OS19-18	8.11	4160	237.5	153.6	430	34	687.5	1037.5	12.5	198.25
Pont	Djedida El Cherkia	6° 52' 21"	33° 23' 40"	OS20-18	8.16	4320	232.5	163.8	450	23	712.5	1112.5	4	198.25
Pont	Merzaka	6° 49' 44"	33° 22' 39"	OS21-18	8.03	4550	247.5	192	462	31	750	1050	9	198.25
M-P	El Melia	6° 45' 24"	33° 14' 17"	OS25-18	8.18	5180	275	222.7	580	34	900	1312.5	16	186.05
M-P	Guemar 3 Bab El Guarbi	6° 54' 44"	33° 33' 05"	OS27-18	7.95	4400	247.5	197.1	440	27	700	1200	11	204.35
M-P	Guemar Demitha	7° 01' 50"	33° 36' 15"	OS30-18	8.08	4160	232.5	179.2	412.5	19	662.5	1162.5	6	213.5
M-P	Mouih Ouenza F1 01 bis	6° 43' 18"	33° 32' 13"	OS31-18	7.77	4600	252.5	204.8	500	26	750	1225	7.5	198.25
M-P	Ourmes 01 Bis	6° 48' 42"	33° 23' 47"	OS32-18	7.98	4530	262.5	197.1	500	26	780.5	1150	29.5	192.15
Pont	Leghdamsi Baiyada	6° 45' 24"	33° 15' 25"	OS33-18	7.96	5180	272.5	212.5	570	29	1000	1235.5	14	183
Pont	Khobna et Aouissa	6° 56' 00"	33° 24' 57"	OS34-18	8.17	4130	240	204.8	400	32	687.5	1000	16.5	204.35
Pont	Kouinine Chikh Echraa	6° 55' 33"	33° 33' 43"	OS35-18	7.95	4070	262.5	166.4	425	26	675	1050	11.5	204.35
M-P	400 logts	6° 42' 52"	33° 12' 26"	OS36-18	8.12	5180	272.5	235.5	470	34	837.5	1337.5	17	186.05
M-P	Oued Alanda 02	6° 51' 32"	33° 21' 23"	OS37-18	8.03	4170	235	151	440	23	650	1112.5	14	204.25
M-P	Cité 19 mars	7° 01' 41"	33° 40' 09"	OS38-18	7.97	4240	232.5	194.6	430	19	712.5	1212.5	14	192.15
M-P	Trifaoui	6° 53' 05"	33° 19' 44"	OS39-18	8.09	4090	235	153.6	430	32	700	1000	22.5	195.2

## Sheet: AHC_HID
6.48047	-0.262885	1	1	1.75	-0.262885	1	1
2.21094	-0.262885	2	1	1	-0.262885	2	1
2.21094	0.154744	3	1	1	1	3	1
1	0.154744	4	1	1	-0.262885
1	1	5	1	2.5	-0.262885
1	0.154744	6	1	2.5	0.0205571
3.42188	0.154744	7	1	2	0.0205571
3.42188	0.328332	8	1	2	1
2	0.328332	9	1	2	0.0205571
2	1	10	1	3	0.0205571
2	0.328332	11	1	3	1
4.84375	0.328332	12	1	3	0.0205571
4.84375	0.569947			2.5	0.0205571
3	0.569947			2.5	-0.262885
3	1			1.75	-0.262885
3	0.569947
6.6875	0.569947
6.6875	0.630968
4.875	0.630968
4.875	0.791246
4	0.791246
4	1
4	0.791246
5.75	0.791246
5.75	0.867076
5	0.867076
5	1
5	0.867076
6.5	0.867076
6.5	0.919002
6	0.919002
6	1
6	0.919002
7	0.919002
7	1
7	0.919002
6.5	0.919002
6.5	0.867076
5.75	0.867076
5.75	0.791246
4.875	0.791246
4.875	0.630968
8.5	0.630968
8.5	0.640026
8	0.640026
8	1
8	0.640026
9	0.640026
9	1
9	0.640026
8.5	0.640026
8.5	0.630968
6.6875	0.630968
6.6875	0.569947
4.84375	0.569947
4.84375	0.328332
3.42188	0.328332
3.42188	0.154744
2.21094	0.154744
2.21094	-0.262885
10.75	-0.262885
10.75	0.0205571
10	0.0205571
10	1
10	0.0205571
11.5	0.0205571
11.5	0.174806
11	0.174806
11	1
11	0.174806
12	0.174806
12	1
12	0.174806
11.5	0.174806
11.5	0.0205571
10.75	0.0205571
10.75	-0.262885
6.48047	-0.262885

## Sheet: AHC_HID1
0	1	2	3	4	5	6	7	8	9	10	11	12	13	14	15	16	17	18	19	20	21	22	23	24
4	4	4	4	4	4	4	4	4	4	4	4	4	4	4	4	4	4	4	4	4	4	4	4	4
5180	5180	5180	5180	5180	5180	5180	5180	5180	5180	5180	5180	5180	5180	5180	5180	5180	5180	5180	5180	5180	5180	5180	5180	5180
112.7	118.35	118.35	108.525	115.4	119.35	109.75	108.075	114.525	113.775	113.675	113.975	116.025	108.025	118.075	122.65	114.425	110.925	117.675	117.575	117.775	106.25	108.175	112.175	113.1
8.08	8.09	7.63	8.02	7.86	8.68	8.17	8.28	7.91	8.11	8.11	8.16	8.03	8.18	7.95	8.08	7.77	7.98	8.17	7.95	8.03	7.96	8.12	7.97	8.09
1107.59	1074.24	1136.3	1065.36	1152.79	1113.38	1207	1277.28	1221.34	1247.09	1060.4	1101.7	1136.83	1338.47	1138.84	1080.24	1192.2	1179.29	1055.09	1056.38	1069.5	1336.72	1308.22	1118.01	1047.9

## Sheet: AHC_HID2
2.03516	-0.482171	1	1	1.99219	-0.482171	1	1
1	-0.482171	2	1	1	-0.482171	2	1
1	1	3	1	1	1	3	1
1	-0.482171	4	1	1	-0.482171	4	1
3.07031	-0.482171	5	1	2.98438	-0.482171	5	1
3.07031	-0.0209067	6	1	2.98438	-0.0209067	6	1
2	-0.0209067	7	1	2	-0.0209067	7	1
2	1	8	1	2	1	8	1
2	-0.0209067	9	1	2	-0.0209067
4.14062	-0.0209067	10	1	3.96875	-0.0209067
4.14062	0.156158			3.96875	0.156158
3	0.156158			3	0.156158
3	1			3	1
3	0.156158			3	0.156158
5.28125	0.156158			4.9375	0.156158
5.28125	0.327688			4.9375	0.327688
4	0.327688			4	0.327688
4	1			4	1
4	0.327688			4	0.327688
6.5625	0.327688			5.875	0.327688
6.5625	0.547309			5.875	0.547309
5	0.547309			5	0.547309
5	1			5	1
5	0.547309			5	0.547309
8.125	0.547309			6.75	0.547309
8.125	0.57269			6.75	0.57269
6.75	0.57269			6	0.57269
6.75	0.779011			6	1
6	0.779011			6	0.57269
6	1			7.5	0.57269
6	0.779011			7.5	0.640026
7.5	0.779011			7	0.640026
7.5	0.880524			7	1
7	0.880524			7	0.640026
7	1			8	0.640026
7	0.880524			8	1
8	0.880524			8	0.640026
8	1			7.5	0.640026
8	0.880524			7.5	0.57269
7.5	0.880524			6.75	0.57269
7.5	0.779011			6.75	0.547309
6.75	0.779011			5.875	0.547309
6.75	0.57269			5.875	0.327688
9.5	0.57269			4.9375	0.327688
9.5	0.640026			4.9375	0.156158
9	0.640026			3.96875	0.156158
9	1			3.96875	-0.0209067
9	0.640026			2.98438	-0.0209067
10	0.640026			2.98438	-0.482171
10	1			1.99219	-0.482171
10	0.640026
9.5	0.640026
9.5	0.57269
8.125	0.57269
8.125	0.547309
6.5625	0.547309
6.5625	0.327688
5.28125	0.327688
5.28125	0.156158
4.14062	0.156158
4.14062	-0.0209067
3.07031	-0.0209067
3.07031	-0.482171
2.03516	-0.482171

## Sheet: AHC_HID3
0	1	2	3	4	5	6	7	8	9	10	11	12	13	14	15	16	17	18	19	20	21	22	23	24
4	4	4	4	4	4	4	4	4	4	4	4	4	4	4	4	4	4	4	4	4	4	4	4	4
5180	5180	5180	5180	5180	5180	5180	5180	5180	5180	5180	5180	5180	5180	5180	5180	5180	5180	5180	5180	5180	5180	5180	5180	5180
8.08	8.09	7.63	8.02	7.86	8.68	8.17	8.28	7.91	8.11	8.11	8.16	8.03	8.18	7.95	8.08	7.77	7.98	8.17	7.95	8.03	7.96	8.12	7.97	8.09
1750.83	1770	1823.33	1739.17	1900.83	1815.83	1982.5	2169.5	1967.5	1989.17	1759.17	1827.5	1920.67	2220	1846.67	1745	1950	1936.83	1739.17	1723.33	1753.33	2250	2162.5	1794.17	1740
235	232.5	245	265	250	240	262.5	272.5	247.3	317.5	237.5	232.5	247.5	275	247.5	232.5	252.5	262.5	240	262.5	235	272.5	272.5	232.5	235
204.8	163.8	199.7	179.2	153.6	166.4	204.5	192	204.8	204.8	153.6	163.8	192	222.7	197.1	179.2	204.8	197.1	204.8	166.4	151	212.5	235.5	194.6	153.6
34	19	27	31	26	21.5	28.5	30	31	31	34	23	31	34	27	19	26	26	32	26	23	29	34	19	32
1187.5	1087.5	1225	1037.5	1187.5	1187.5	1162.5	1225	1350	1375	1037.5	1112.5	1050	1312.5	1200	1162.5	1225	1150	1000	1050	1112.5	1235.5	1337.5	1212.5	1000
12.5	7.4	13	16	22.5	8.5	31.5	16.5	6.5	7	12.5	4	9	16	11	6	7.5	29.5	16.5	11.5	14	14	17	14	22.5
195.2	207.4	207.4	186.05	201.3	207.4	189.1	186.05	198.25	198.25	198.25	198.25	198.25	186.05	204.35	213.5	198.25	192.15	204.35	204.35	204.25	183	186.05	192.15	195.2

## Sheet: AHC1_HID
11.6406	-0.780604	1	1	1.75	-0.780604	1	1
5.375	-0.780604	2	1	1	-0.780604	2	1
5.375	0.769317	3	1	1	1	3	1
1.75	0.769317	4	1	1	-0.780604
1.75	0.946633	5	1	2.5	-0.780604
1	0.946633	6	1	2.5	0.482264
1	1	7	1	2	0.482264
1	0.946633	8	1	2	1
2.5	0.946633	9	1	2	0.482264
2.5	0.975081	10	1	3	0.482264
2	0.975081	11	1	3	1
2	1	12	1	3	0.482264
2	0.975081	13	1	2.5	0.482264
3	0.975081	14	1	2.5	-0.780604
3	1	15	1	1.75	-0.780604
3	0.975081	16	1
2.5	0.975081	17	1
2.5	0.946633	18	1
1.75	0.946633	19	1
1.75	0.769317	20	1
9	0.769317	21	1
9	0.899483	22	1
5.5	0.899483	23	1
5.5	0.971969	24	1
4	0.971969	25	1
4	1
4	0.971969
7	0.971969
7	0.986303
5.5	0.986303
5.5	0.990444
5	0.990444
5	1
5	0.990444
6	0.990444
6	1
6	0.990444
5.5	0.990444
5.5	0.986303
8.5	0.986303
8.5	0.988352
7.5	0.988352
7.5	0.997047
7	0.997047
7	1
7	0.997047
8	0.997047
8	1
8	0.997047
7.5	0.997047
7.5	0.988352
9.5	0.988352
9.5	0.995831
9	0.995831
9	1
9	0.995831
10	0.995831
10	1
10	0.995831
9.5	0.995831
9.5	0.988352
8.5	0.988352
8.5	0.986303
7	0.986303
7	0.971969
5.5	0.971969
5.5	0.899483
12.5	0.899483
12.5	0.948104
11.5	0.948104
11.5	0.977027
11	0.977027
11	1
11	0.977027
12	0.977027
12	1
12	0.977027
11.5	0.977027
11.5	0.948104
13.5	0.948104
13.5	0.974223
13	0.974223
13	1
13	0.974223
14	0.974223
14	1
14	0.974223
13.5	0.974223
13.5	0.948104
12.5	0.948104
12.5	0.899483
9	0.899483
9	0.769317
5.375	0.769317
5.375	-0.780604
17.9062	-0.780604
17.9062	0.482264
15.75	0.482264
15.75	0.690023
15	0.690023
15	1
15	0.690023
16.5	0.690023
16.5	0.934364
16	0.934364
16	1
16	0.934364
17	0.934364
17	1
17	0.934364
16.5	0.934364
16.5	0.690023
15.75	0.690023
15.75	0.482264
20.0625	0.482264
20.0625	0.576855
18	0.576855
18	1
18	0.576855
22.125	0.576855
22.125	0.836782
20.5	0.836782
20.5	0.971208
19.5	0.971208
19.5	0.983319
19	0.983319
19	1
19	0.983319
20	0.983319
20	1
20	0.983319
19.5	0.983319
19.5	0.971208
21.5	0.971208
21.5	0.981918
21	0.981918
21	1
21	0.981918
22	0.981918
22	1
22	0.981918
21.5	0.981918
21.5	0.971208
20.5	0.971208
20.5	0.836782
23.75	0.836782
23.75	0.904705
23	0.904705
23	1
23	0.904705
24.5	0.904705
24.5	0.967128
24	0.967128
24	1
24	0.967128
25	0.967128
25	1
25	0.967128
24.5	0.967128
24.5	0.904705
23.75	0.904705
23.75	0.836782
22.125	0.836782
22.125	0.576855
20.0625	0.576855
20.0625	0.482264
17.9062	0.482264
17.9062	-0.780604
11.6406	-0.780604

[truncated: 14 more sheets: AHC1_HID1, AHC2_HID, AHC2_HID1, AHC3_HID, AHC3_HID1, AHC chemical elements, AHC water samples, water groups Min MAx Mean, PCA  data, PCA_HID2, PCA_HID3, PCA, WQI, Binary diagrams]
